# Supplementary material for: Crosslinked xylose-based polyester as a bio-derived and degradable solid polymer electrolyte for Li+-ion conduction
Source: Royal Society of Chemistry journal article supplement (doi:10.1039/d1ta10111k), 2022-01-01
Supplement: d1ta10111k1.pdf [file d1ta10111k1.pdf]

## **Supporting Information**

# **Crosslinked Xylose-Based Polyester as a Bio-Derived Solid Polymer Electrolyte for Li<sup>+</sup>-Ion Conduction**

Matthew Oshinowo, James R. Runge, Marco Piccini, Frank Marken and Antoine Buchard\*

*Department of Chemistry, Centre for Sustainable and Circular Technologies,  
University of Bath, Claverton Down, Bath BA2 7AY, UK*

Email: a.buchard@bath.ac.uk

## **Contents**

|                                                       |    |
|-------------------------------------------------------|----|
| 1. Calculation of theoretical molar mass.....         | 2  |
| 2. NMR spectra .....                                  | 3  |
| 3. FTIR spectra.....                                  | 4  |
| 4. Size-exclusion chromatography (SEC).....           | 5  |
| 5. Electrochemical impedance spectroscopy (EIS) ..... | 6  |
| 6. Conductivity normalisation .....                   | 7  |
| 7. Lithium transference number ( $t_+$ ).....         | 8  |
| 8. Oligomeric SPE study .....                         | 9  |
| 9. Differential scanning calorimetry (DSC) .....      | 10 |
| 10. Uniaxial tensile strength testing.....            | 14 |
| 11. Thermogravimetric analysis (TGA).....             | 15 |

## **1. Calculation of theoretical molar mass**

The theoretical molar mass ( $M_{n,theo}$ ) of poly(**1**) was determined using a version of the Carothers equation:

$$M_{n,theo} = MW_{\text{repeat unit}} \times \left( \frac{(1+r)}{(1+r) - (2 \times r) \times \text{conv.}} \right) \quad \text{(Equation 1)}$$

$$r = \left( \frac{n_1}{n_1 + 2(n_{\text{cat}} + n_{\text{mod}})} \right) \quad \text{(Equation 2)}$$

where  $n_1$  is the number of moles of monomer **1**,  $n_{\text{cat}}$  is the number of moles of G-II or HG-II, and  $n_{\text{mod}}$  is the number of moles of methyl 10-undecenoate.

## 2. NMR spectra

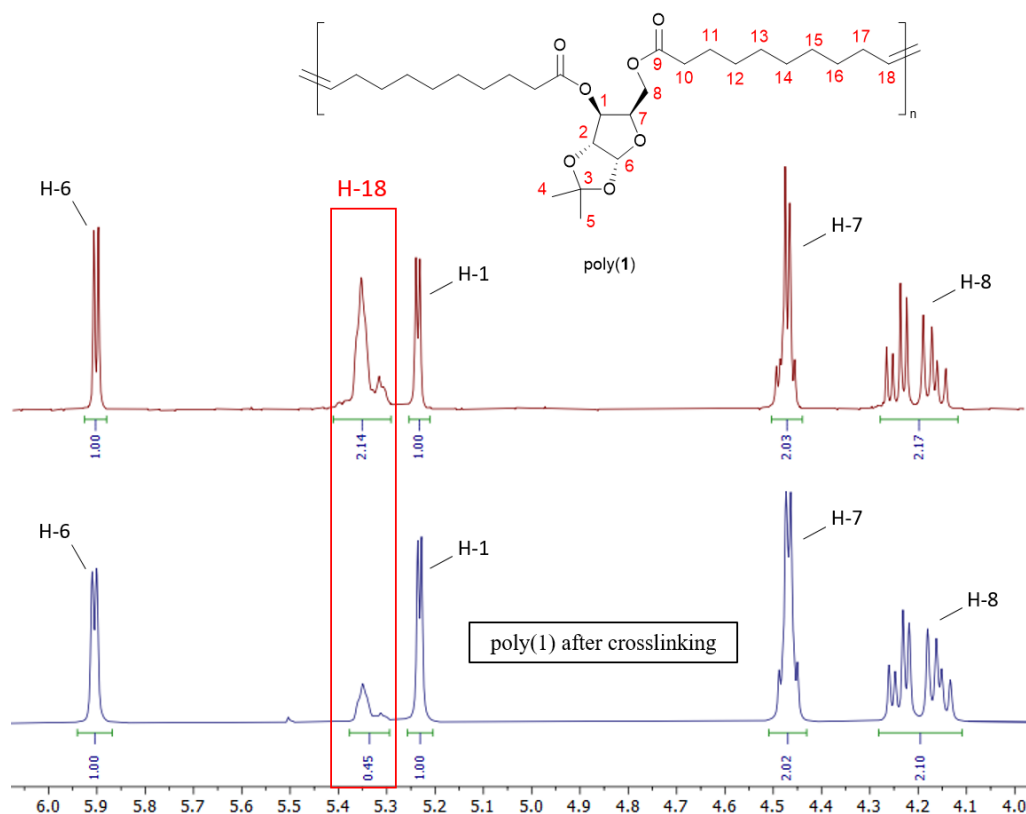

**Fig. S1:** Zoomed in <sup>1</sup>H NMR spectra of poly(1) in CDCl<sub>3</sub> before and after crosslinking with an excess (10 equivalents) of EDDT (neat, 2 hours, 70 °C, 365 nm).

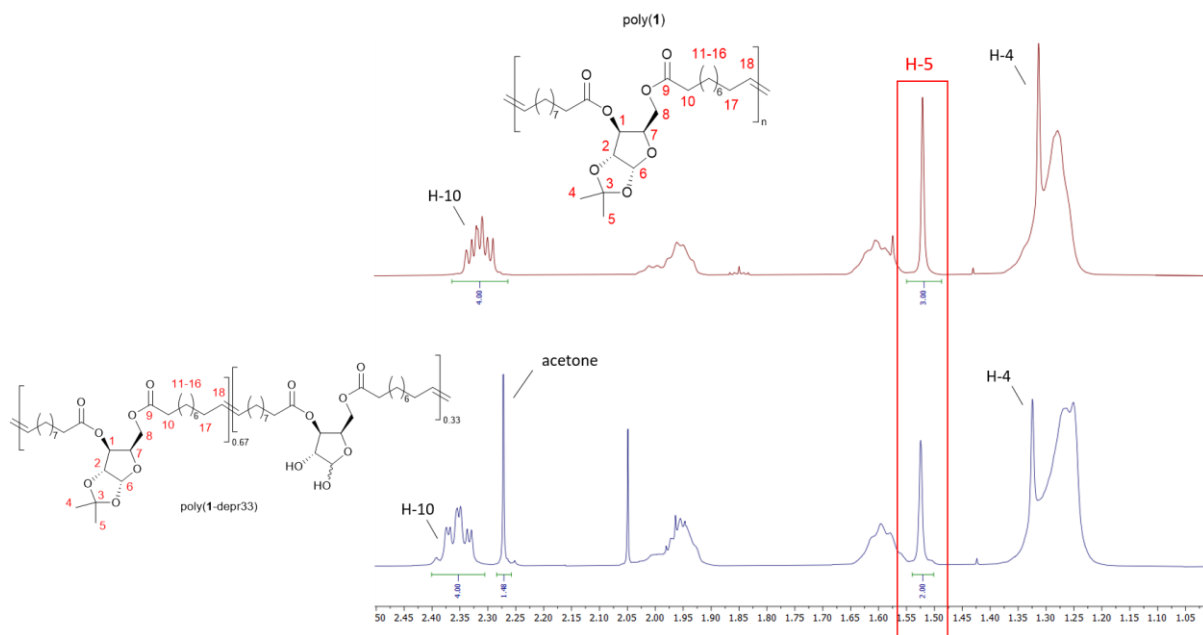

**Fig. S2:** Zoomed in <sup>1</sup>H NMR spectra of poly(1) and poly(1-depr33) in CDCl<sub>3</sub> showing the reduction in relative integration of the isopropylidene methyl peak upon deprotection of OH group. Acetone peak is present as the by-product of OH deprotection.

### 3. FTIR spectra

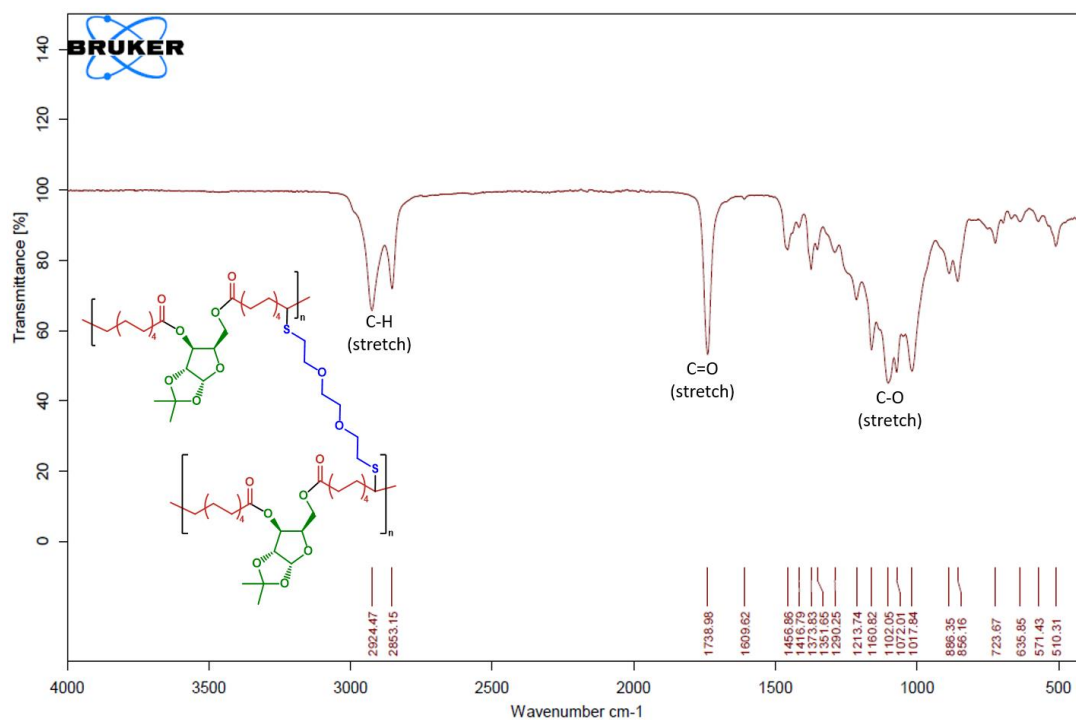

**Fig. S3:** FTIR spectrum of poly(1-EDDET).

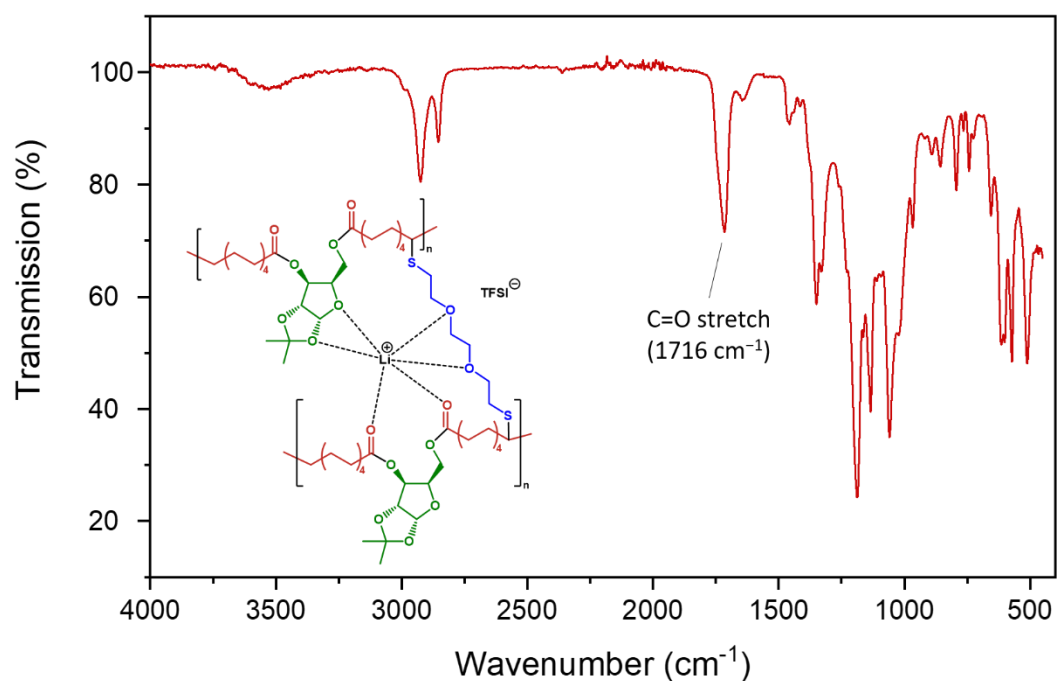

**Fig. S4:** FTIR spectrum of **1b-100** as a representative SPE. Inset structure shows some of the possible  $\text{Li}^+$  ion coordinating sites in the crosslinked polymer.

#### 4. Size-exclusion chromatography (SEC)

All  $M_n$  values refer to poly(**1**) or poly(**1**-depr33) prior to crosslinking.

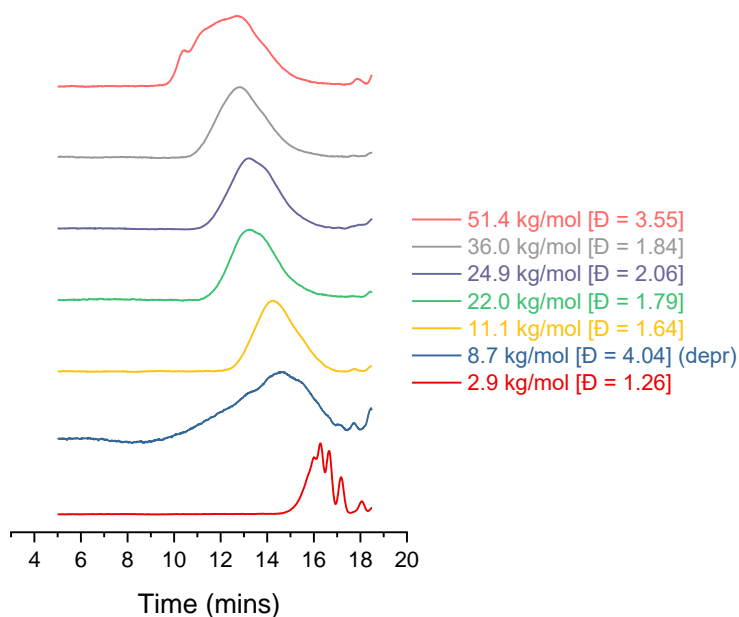

**Fig. S5:** Stacked SEC traces of selected samples of poly(**1**) and poly(**1**-depr) from Table 1. Samples were prepared THF (1-2 mg mL<sup>-1</sup>) which was also used as the mobile phase for separation through the column. Detection was achieved using a refractive index method and the system calibrated with polystyrene standards. The blue trace represents the chromatogram for poly(**1**-depr) for which 33% of the protecting ketal groups have been removed to reveal OH groups on the xylose core.

## 5. Electrochemical impedance spectroscopy (EIS)

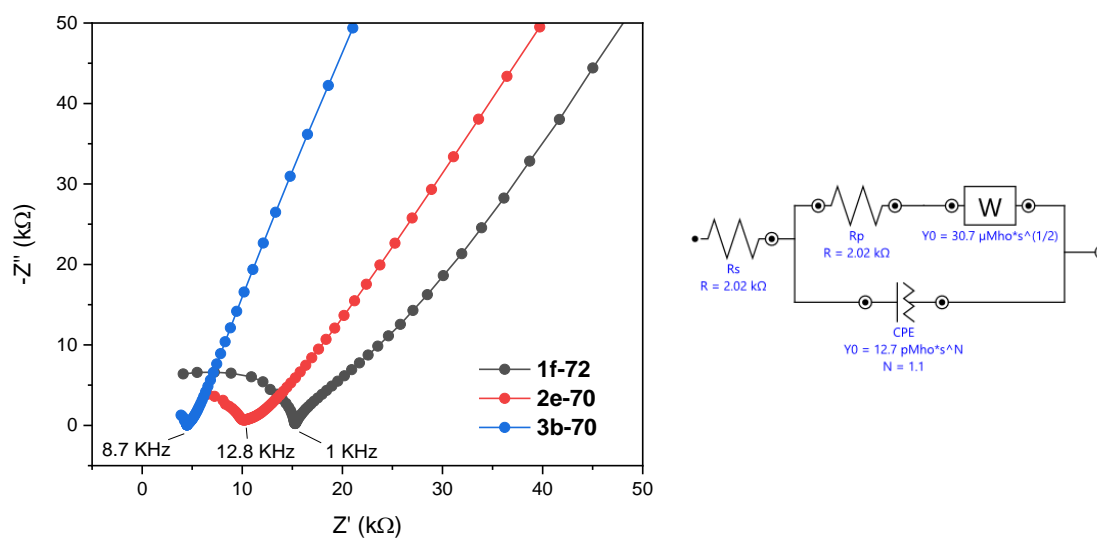

**Fig. S6:** Nyquist plots of representative SPEs based on poly(1-EDDET) measured in the frequency range of 0.1 Hz – 0.5 MHz. An example Randles circuit fitting for **3b-70** is shown on the right where  $R_p$  is equivalent to the bulk resistance  $R_b$ . For reference, the frequency corresponding to  $R_b$  is shown at the intersection of the semi-circle and straight line due to Warburg diffusion on the Nyquist plot.

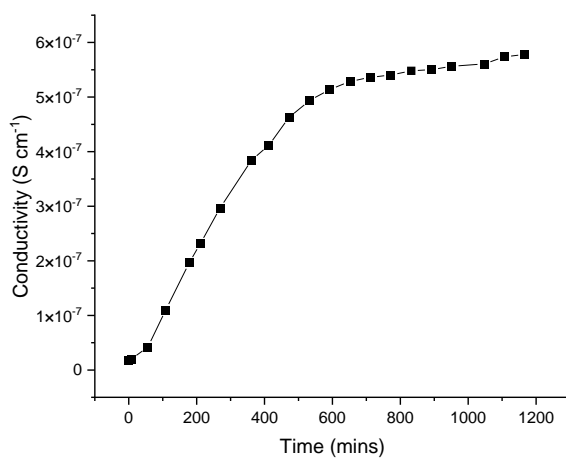

**Fig. S7:** Chart showing the conductivity hysteresis of SPE **1f-100** ( $M_{n,SEC} = 2.9 \text{ kg mol}^{-1}$ , salt molarity = 100 mol%, 1.0 EDDT equivalents) measured over 12 hours at 68 °C.

## 6. Conductivity normalisation

**Table S1:** Example of raw data used for the temperature normalisation to 60 °C for **1a-72**.

| T    | T   | 1000/T             | R <sub>b</sub>          | σ                      | log(σ)                |
|------|-----|--------------------|-------------------------|------------------------|-----------------------|
| (°C) | (K) | (K <sup>-1</sup> ) | (Ω)                     | (S cm <sup>-1</sup> )  | (S cm <sup>-1</sup> ) |
| 27   | 300 | 3.33               | 7.64 × 10 <sup>-5</sup> | 1.5 × 10 <sup>-7</sup> | -6.8                  |
| 33   | 306 | 3.27               | 3.08 × 10 <sup>-5</sup> | 3.8 × 10 <sup>-7</sup> | -6.4                  |
| 40   | 313 | 3.19               | 1.41 × 10 <sup>-5</sup> | 8.4 × 10 <sup>-7</sup> | -6.1                  |
| 52   | 325 | 3.08               | 3.68 × 10 <sup>-4</sup> | 3.2 × 10 <sup>-6</sup> | -5.5                  |
| 62   | 335 | 2.99               | 1.31 × 10 <sup>-4</sup> | 9.0 × 10 <sup>-6</sup> | -5.0                  |

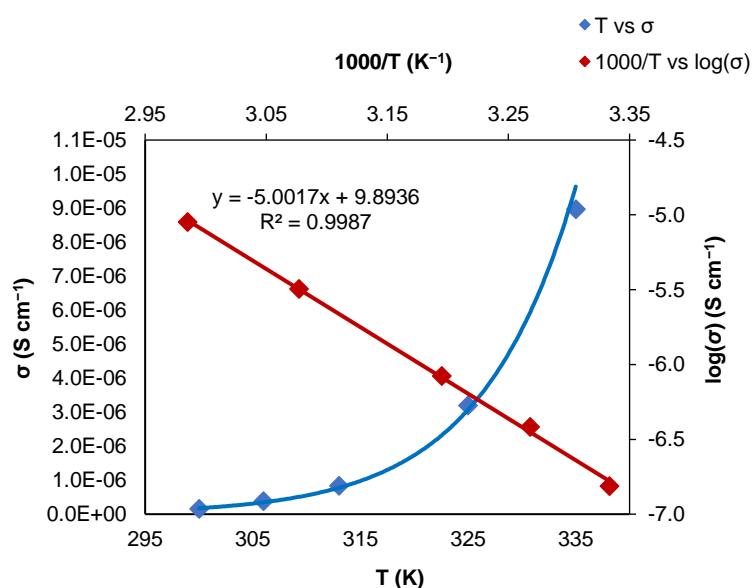

**Fig. S8:** Plot of raw conductivity data and Arrhenius plot of **1a-72** used for temperature normalisation to 60 °C.

The following derivation of a linear equation was used to normalise the conductivity of each sample to 60 °C:

$$\sigma = 10^{(m \times (1000/T) + c)} \quad \text{(Equation 3)}$$

where  $m$  and  $c$  are equal to the gradient and y-intercept of the straight line in Fig. S8, and  $T$  is equal to 333 K.

**Table S2:** Normalisation of conductivity to 60 °C for **1a-72** using the plotted data in Fig. S8.

|                                             |                        |
|---------------------------------------------|------------------------|
| Slope (S cm <sup>-1</sup> K <sup>-1</sup> ) | -5.0017                |
| x-intercept (K)                             | 9.8936                 |
| Normalisation temperature (K)               | 333                    |
| σ at 60 °C (S cm <sup>-1</sup> )            | 7.5 × 10 <sup>-6</sup> |

## 7. Lithium transference number ( $t_+$ )

Table S3: Data used for the determination of  $t_+$  for **2e-70** (Fig. 4B).

| Repeat | $I_0$<br>(A)           | $I_{ss}$<br>(A)        | $R_{b,0}$<br>( $\Omega$ ) | $R_{b,ss}$<br>( $\Omega$ ) | $t_+$               |
|--------|------------------------|------------------------|---------------------------|----------------------------|---------------------|
| 1      | $5.188 \times 10^{-8}$ | $4.348 \times 10^{-8}$ | 57820                     | 61782                      | 0.80                |
| 2      | $4.810 \times 10^{-8}$ | $4.152 \times 10^{-8}$ | 57183                     | 61994                      | 0.84                |
| 3      | $4.553 \times 10^{-8}$ | $4.043 \times 10^{-8}$ | 58383                     | 61536                      | 0.87                |
| 4      | $4.224 \times 10^{-8}$ | $3.580 \times 10^{-8}$ | 59118                     | 74330                      | 0.87                |
| 5      | $3.760 \times 10^{-8}$ | $3.062 \times 10^{-8}$ | 61459                     | 83553                      | 0.84                |
|        |                        |                        |                           |                            | 0.84 ( $\pm 0.01$ ) |

$t_+$  was calculated using the Bruce-Vincent equation: 
$$t_+ = \frac{I_{ss}(\Delta V - I_0 R_{b,0})}{I_0(\Delta V - I_{ss} R_{b,ss})}$$

where:

$I_0$  = current prior to DC polarisation

$I_{ss}$  = steady-state current

$R_{b,0}$  = bulk resistance determined from an EIS measurement prior to DC polarisation

$R_{b,ss}$  = bulk resistance determined from an EIS measurement after steady-state current is reached

$\Delta V$  = polarisation potential (= 0.01 V)

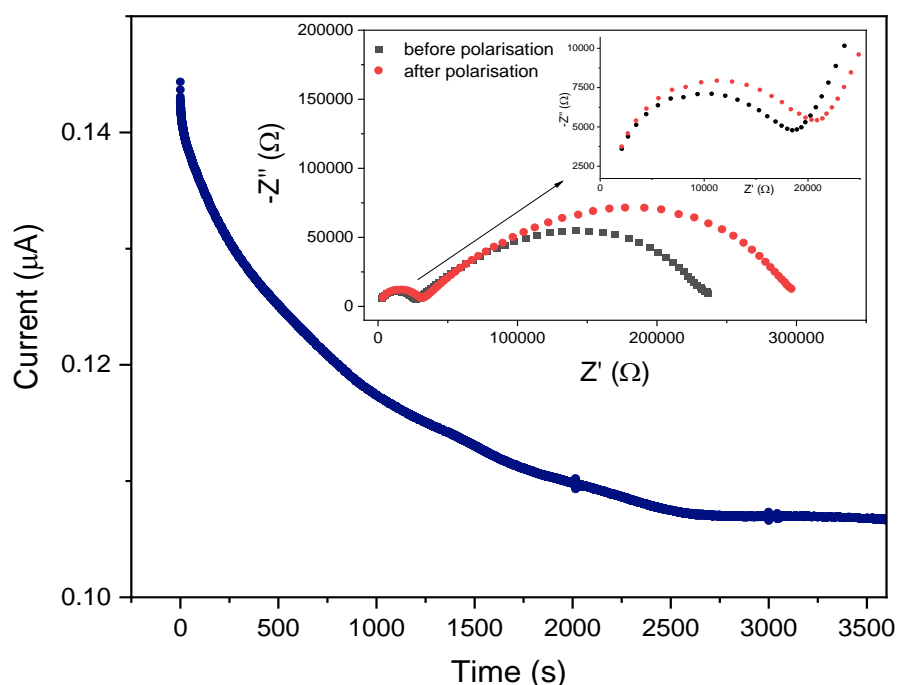

**Fig. S9:** Additional chronoamperometry and Nyquist plot (inlayed) obtained for a representative SPE sample ( $M_n$  12.4 kg/mol, 70 mol% LiTFSI, 0.05 equivs EDDT,  $T_g = 9^\circ\text{C}$ ). A 10 mV polarization voltage was applied for 1 hour in a symmetrical Li|SPE|Li cell. The Nyquist plot was obtained by EIS recorded in the frequency range of 0.1 Hz – 1 MHz before and after the chronoamperometry experiment. A  $t_+$  value of 0.66 was determined using the Bruce-Vincent equation.



## 8. Oligomeric SPE study

**Table S4:** Conductivity data for SPE films based on an oligomeric sample of poly(1).

| Entry | SPE reference | $M_{n,SEC}^a$<br>(kg mol <sup>-1</sup> ) | Crosslinker<br>equivalents <sup>d</sup> | Salt mol% <sup>b</sup><br>[wt%] <sup>c</sup> | $T_g^e$<br>(°C) | Conductivity <sup>f</sup><br>(S cm <sup>-1</sup> ) |
|-------|---------------|------------------------------------------|-----------------------------------------|----------------------------------------------|-----------------|----------------------------------------------------|
| 1     | <b>1f-0</b>   | 2.9                                      | 1.0                                     | 0 [0]                                        | -23             | —                                                  |
| 2     | <b>1f-25</b>  | 2.9                                      | 1.0                                     | 25 [15]                                      | -23             | $5.3 \times 10^{-7}$                               |
| 3     | <b>1f-40</b>  | 2.9                                      | 1.0                                     | 40 [23]                                      | -7              | $5.8 \times 10^{-6}$                               |
| 4     | <b>1f-50</b>  | 2.9                                      | 1.0                                     | 50 [29]                                      | -10             | $1.6 \times 10^{-6}$                               |
| 5     | <b>1f-60</b>  | 2.9                                      | 1.0                                     | 60 [35]                                      | -7              | $4.7 \times 10^{-6}$                               |
| 6     | <b>1f-72</b>  | 2.9                                      | 1.0                                     | 72 [42]                                      | -25             | $7.5 \times 10^{-6}$                               |
| 7     | <b>1f-85</b>  | 2.9                                      | 1.0                                     | 85 [49]                                      | -15             | $1.7 \times 10^{-6}$                               |
| 8     | <b>1f-100</b> | 2.9                                      | 1.0                                     | 100 [58]                                     | 4               | $9.8 \times 10^{-7}$                               |

<sup>a</sup> Refers to molar mass of poly(1) prior to crosslinking. <sup>b</sup> Salt mol% calculated as a percentage of moles of salt relative to total number of polymer repeat units moles present. <sup>c</sup> Salt wt% is in reference to the polymer mass prior to crosslinking. <sup>d</sup> Calculated as ratio of EDDT mols to total number of polymer repeat units moles present. <sup>e</sup> Obtained from the second cooling and heating cycle on the DSC thermogram. <sup>f</sup> Normalised to 60 °C using linear regression of an Arrhenius plot of 1000/T vs log( $\sigma$ ).

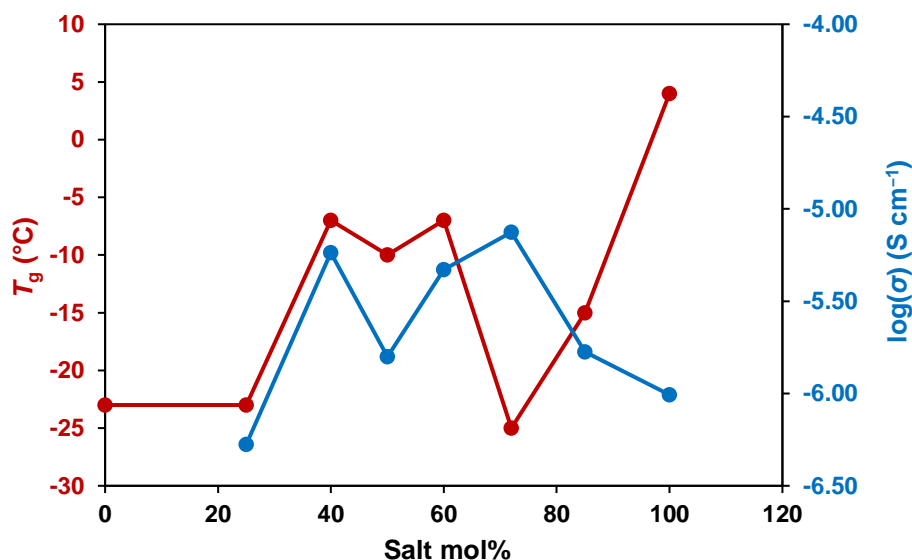

**Fig. S10:** Chart of  $T_g$  and conductivity vs salt molarity for oligomeric samples of poly(1) crosslinked with 1.0 EDDT equivalents.

## 9. Differential scanning calorimetry (DSC)

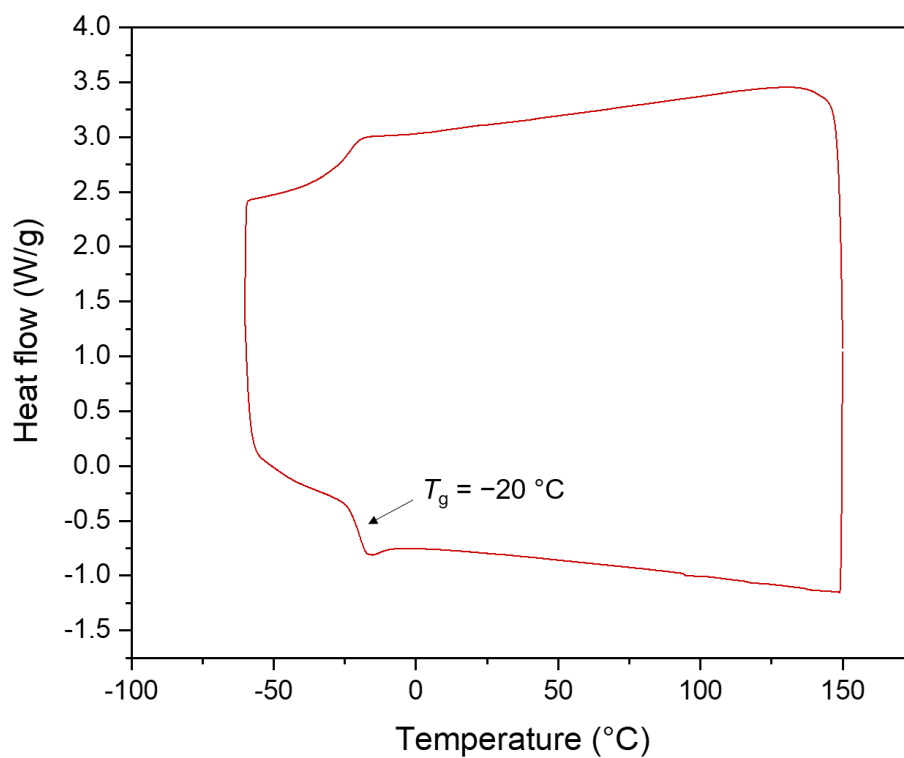

**Fig. S11:** Representative DSC thermogram showing the second cooling and heating cycle of a sample of poly(1) (Table 1, entry 5;  $M_{n,SEC} = 24.7\text{ kg mol}^{-1}$ ).  $T_g = -20\text{ °C}$ .

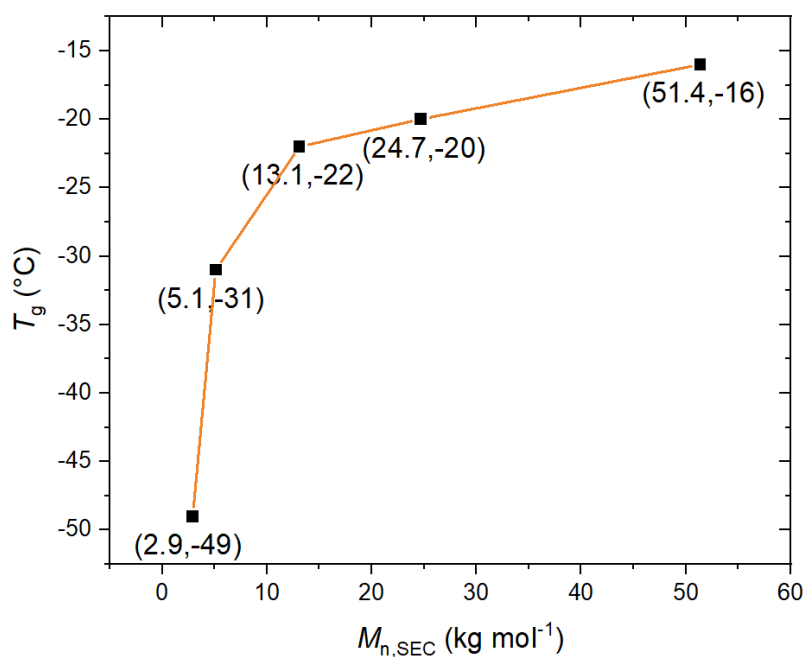

**Fig. S12:** Plot of molecular weight vs  $T_g$  obtained from the second heating cycle in the DSC thermogram for samples of poly(1).

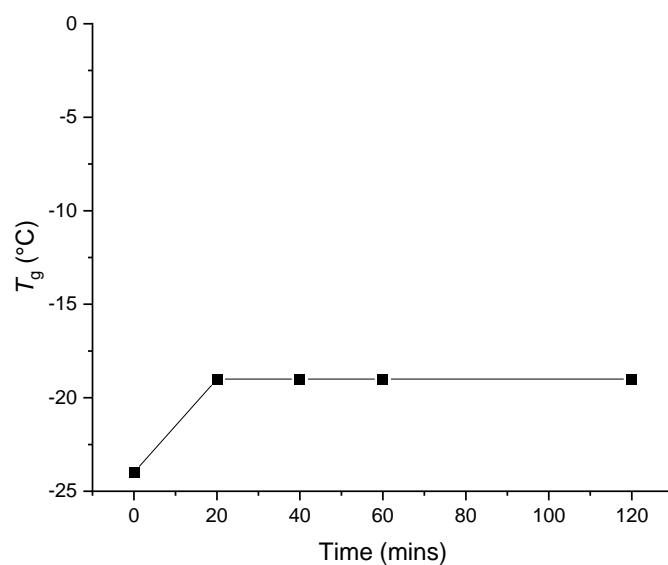

**Fig. S13:** Chart showing the rate of crosslinking as determined by the increase in  $T_g$  of poly(**1**).  $M_{n,SEC} = 24.7 \text{ kg mol}^{-1}$ , salt molarity = 0 mol%, crosslinker equivalents = 0.05.

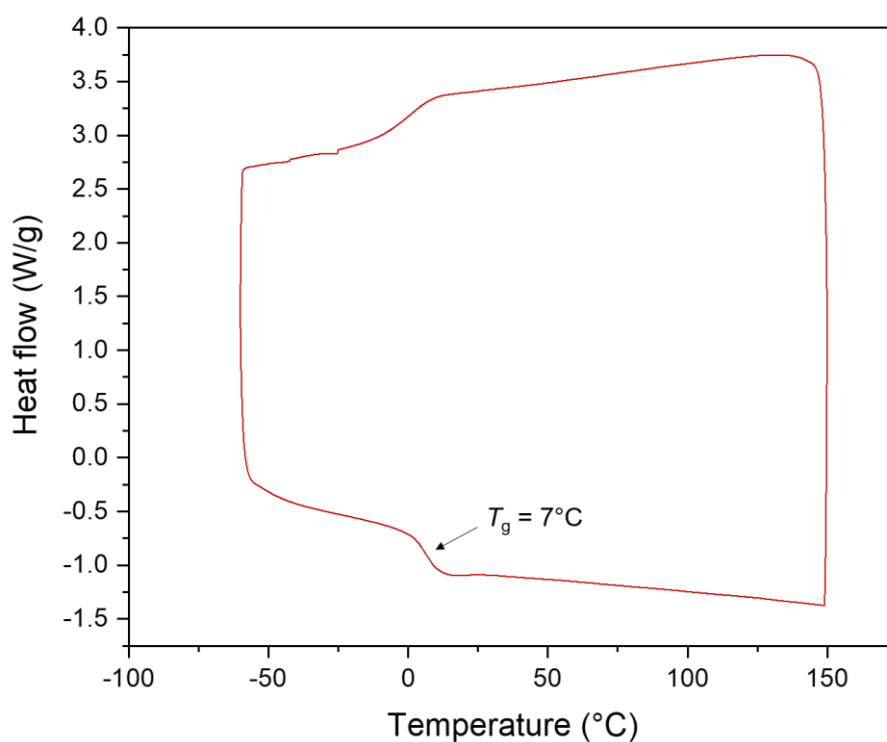

**Fig. S14:** Representative DSC thermogram of an SPE (**3b-70**) showing the second cooling and heating cycle (Table 2, entry 9;  $M_{n,SEC} = 24.9 \text{ kg mol}^{-1}$ , crosslinker equivalents = 0.05, salt amount = 70 mol%).  $T_g = 7^\circ\text{C}$ .

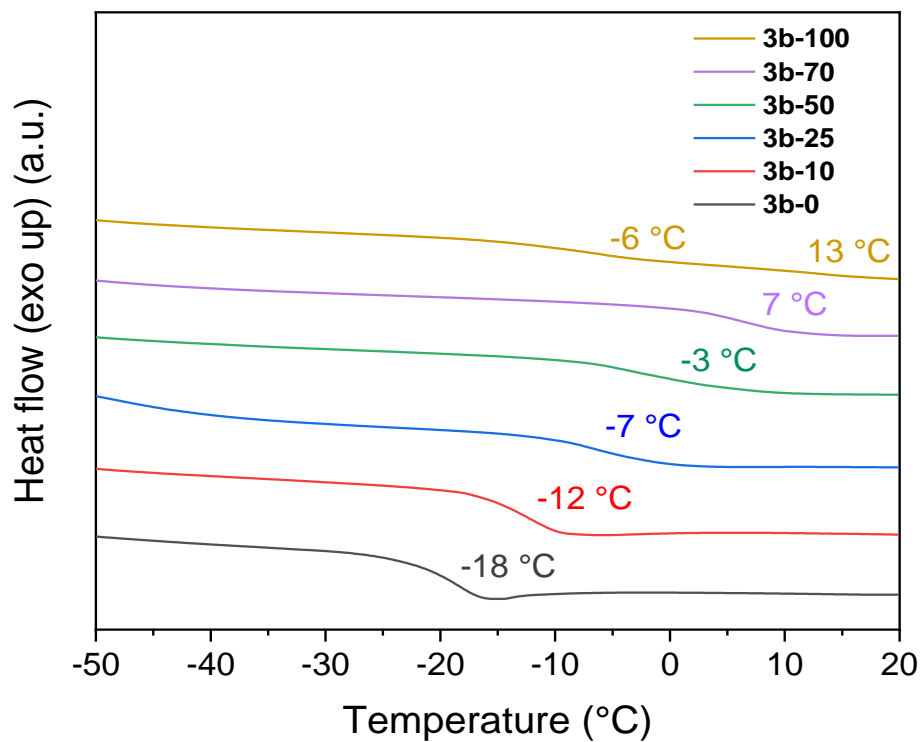

**Fig. S15:** Plot showing the second heating cycle traces obtained from the DSC thermograms of SPEs **3b-x** with varying amounts of LiTFSI (traces are y-offset and zoomed into  $T_g$  region for clarity).

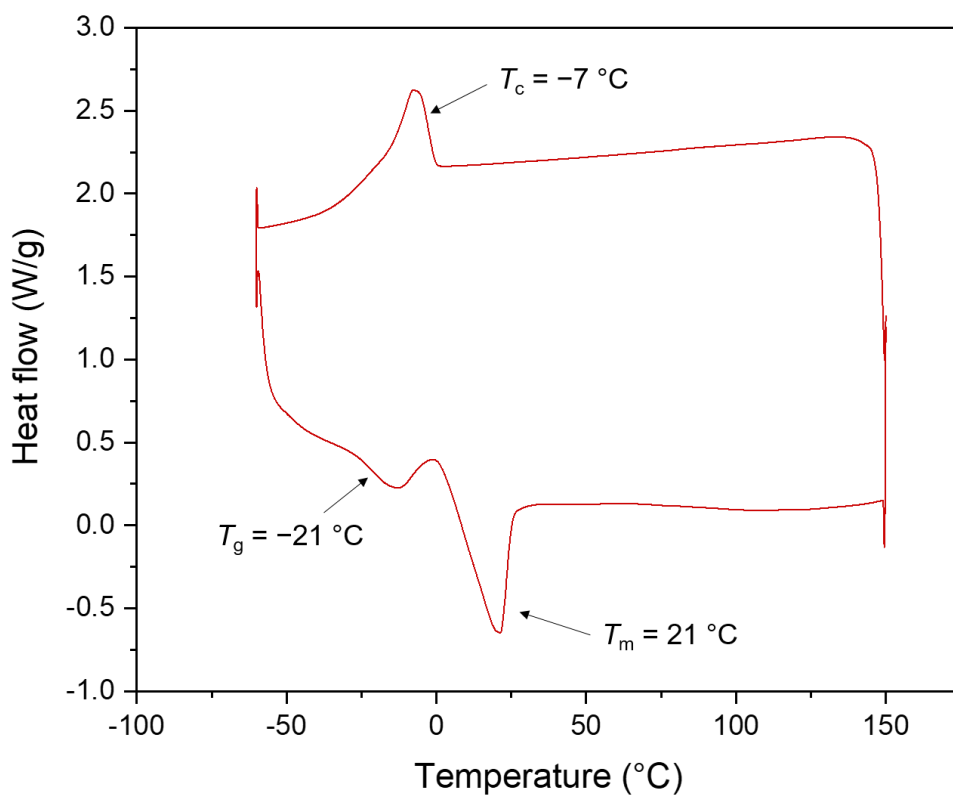

**Fig. S16:** Second cooling and heating cycle in the DSC thermogram of poly(1-depr33).  $T_g = -21$  °C,  $T_m = 21$  °C.

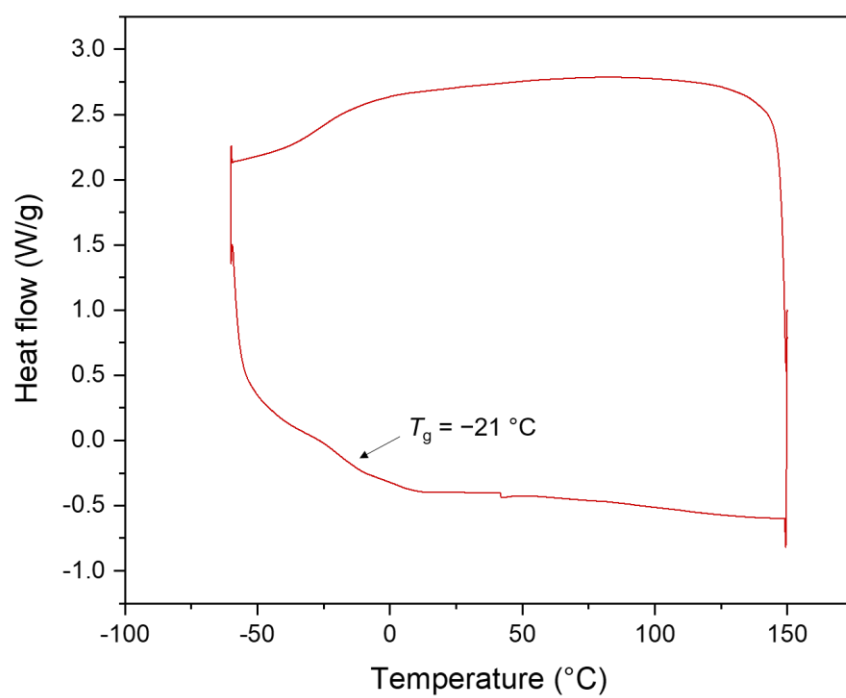

**Fig. S17:** Second cooling and heating cycle in the DSC thermogram of **5b(depr)-70**.  $T_g = -21\text{ }^{\circ}\text{C}$ .

## 10. Uniaxial tensile strength testing

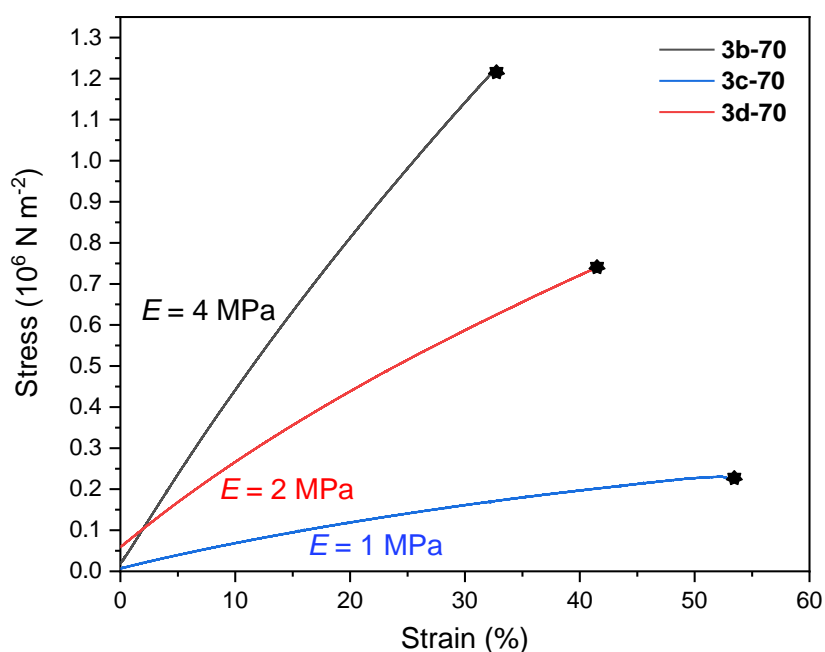

**Fig. S18:** Stress-strain plot demonstrating the uniaxial strength performance of three SPE's with a crosshead speed of  $1 \text{ mm min}^{-1}$ . The black spots represent the break point.  $E$  = Young's modulus.

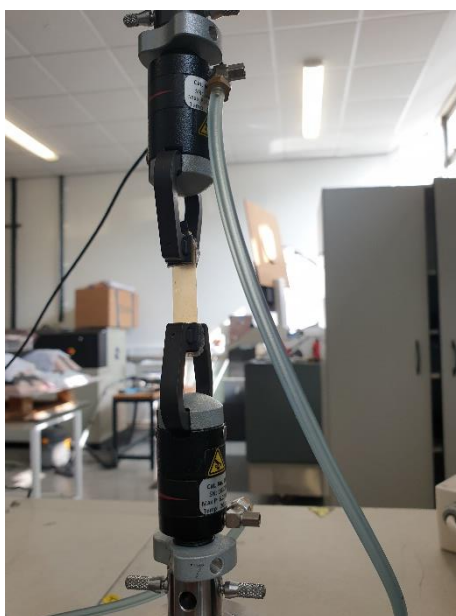

**Fig. S19:** Photograph of the uniaxial tensile strength apparatus setup. Samples were cut into dimensions of approximately  $4 \text{ mm} \times 20 \text{ mm}$  and clamped between 50 N pneumatic grips. The exposed sample had a starting length of 20 mm.

## 11. Thermogravimetric analysis (TGA)

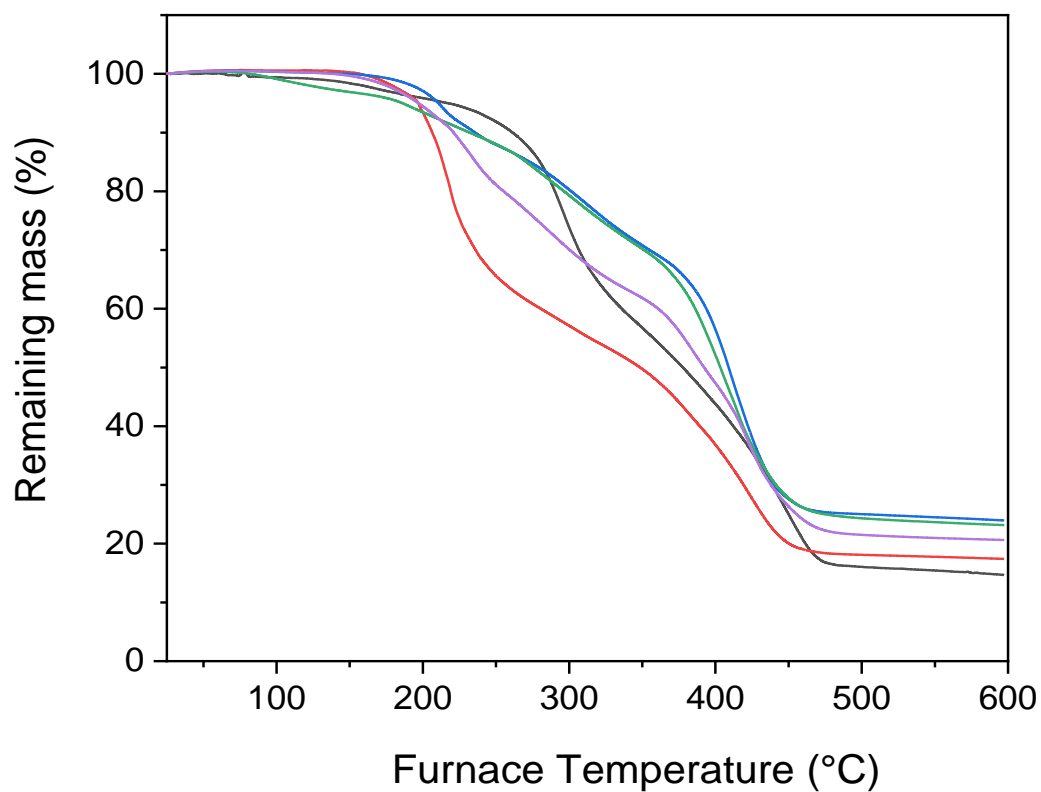

|               | $T_{d1}$ (°C) | $T_{d2}$ (°C) |
|---------------|---------------|---------------|
| poly(1-EDDET) | 297           | 451           |
| 1f-72         | 219           | 424           |
| 2e-70         | 234           | 423           |
| 3b-70         | 213           | 410           |
| 5b-(depr)70   | 295           | 416           |

**Fig. S20:** TGA trace poly(**1**) ( $M_{n,SEC} = 13.1 \text{ kg mol}^{-1}$ ) crosslinked with 10 equivalents of EDDet (black) and representative SPE samples ( $T_{d1}$  and  $T_{d2}$  refer to temperatures for the maximum of the derivative peaks).
